# Supplementary material for: Predicting hospitalization following psychiatric crisis care using machine learning
Source: PubMed Central journal article supplement (PMC7731561; doi:10.1186/s12911-020-01361-1), 2020-12-10
Supplement: 12911_2020_1361_MOESM1_ESM.pdf [file 12911_2020_1361_MOESM1_ESM.pdf]

```

### Default grid search settings caret package
### Matthijs Blankers
### 27 August 2019

library(caret)

## Loading required package: lattice
## Loading required package: ggplot2
packageVersion("caret")

## [1] '6.0.80'
get <- c("parameters", "grid")

getModelInfo("glm")$glm[get]

## $parameters
##   parameter      class      label
## 1 parameter character parameter
##
## $grid
## function (x, y, len = NULL, search = "grid")
## data.frame(parameter = "none")
getModelInfo("nb")$nb[get]

## $parameters
##   parameter  class      label
## 1          fL numeric  Laplace Correction
## 2 usekernel logical    Distribution Type
## 3   adjust numeric Bandwidth Adjustment
##
## $grid
## function (x, y, len = NULL, search = "grid")
## expand.grid(usekernel = c(TRUE, FALSE), fL = 0, adjust = 1)
getModelInfo("gbm")$gbm[get]

## $parameters
##           parameter  class      label
## 1           n.trees numeric  # Boosting Iterations
## 2 interaction.depth numeric      Max Tree Depth
## 3           shrinkage numeric      Shrinkage
## 4   n.minobsinnode numeric Min. Terminal Node Size
##
## $grid
## function (x, y, len = NULL, search = "grid")
## {
##   if (search == "grid") {

```

```

##       out <- expand.grid(interaction.depth = seq(1, len), n.trees = floor((1:len) *
##       50), shrinkage = 0.1, n.minobsinnode = 10)
##     }
##     else {
##       out <- data.frame(n.trees = floor(runif(len, min = 1,
##       max = 5000)), interaction.depth = sample(1:10, replace = TRUE,
##       size = len), shrinkage = runif(len, min = 0.001,
##       max = 0.6), n.minobsinnode = sample(5:25, replace = TRUE,
##       size = len))
##       out <- out[!duplicated(out), ]
##     }
##     out
## }

```

```
getModelInfo("avNNet")$avNNet[get]
```

```

## $parameters
##   parameter  class      label
## 1      size numeric #Hidden Units
## 2      decay numeric Weight Decay
## 3       bag logical   Bagging
##
## $grid
## function (x, y, len = NULL, search = "grid")
## {
##   if (search == "grid") {
##     out <- expand.grid(size = ((1:len) * 2) - 1, decay = c(0,
##     10^seq(-1, -4, length = len - 1)), bag = FALSE)
##   }
##   else {
##     out <- data.frame(size = sample(1:20, size = len, replace = TRUE),
##     decay = 10^runif(len, min = -5, 1), bag = sample(c(TRUE,
##     FALSE), size = len, replace = TRUE))
##   }
##   out
## }

```

```
getModelInfo("svmRadialWeights")$svmRadialWeights[get]
```

```

## $parameters
##   parameter  class  label
## 1      sigma numeric Sigma
## 2       C numeric  Cost
## 3   Weight numeric Weight
##
## $grid
## function (x, y, len = NULL, search = "grid")
## {
##   sigmas <- kernlab::sigest(as.matrix(x), na.action = na.omit,
##   scaled = TRUE)
##   if (search == "grid") {
##     out <- expand.grid(sigma = mean(as.vector(sigmas[-2])),
##     C = 2^((1:len) - 3), Weight = 1:len)
##   }
##   else {

```

```

##      rng <- extendrange(log(sigmas), f = 0.75)
##      out <- data.frame(sigma = exp(runif(len, min = rng[1],
##      max = rng[2])), C = 2^runif(len, min = -5, max = 10),
##      Weight = runif(len, min = 1, max = 25))
##    }
##    out
## }

```

```
getModelInfo("knn")$knn[get]
```

```

## $parameters
##   parameter  class      label
## 1          k numeric #Neighbors
##
## $grid
## function (x, y, len = NULL, search = "grid")
## {
##   if (search == "grid") {
##     out <- data.frame(k = (5:((2 * len) + 4))[(5:((2 * len) +
##     4))%2 > 0])
##   }
##   else {
##     by_val <- if (is.factor(y))
##       length(levels(y))
##     else 1
##     out <- data.frame(k = sample(seq(1, floor(nrow(x)/3),
##     by = by_val), size = len, replace = TRUE))
##   }
##   out
## }

```

```
getModelInfo("rf")$rf[get]
```

```

## $parameters
##   parameter  class      label
## 1          mtry numeric #Randomly Selected Predictors
##
## $grid
## function (x, y, len = NULL, search = "grid")
## {
##   if (search == "grid") {
##     out <- data.frame(mtry = caret::var_seq(p = ncol(x),
##     classification = is.factor(y), len = len))
##   }
##   else {
##     out <- data.frame(mtry = unique(sample(1:ncol(x), size = len,
##     replace = TRUE)))
##   }
##   out
## }

```

```
getModelInfo("deepboost")$deepboost[get]
```

```

## $parameters
##   parameter  class      label
## 1  num_iter  numeric      # Boosting Iterations

```

```

## 2 tree_depth numeric Tree Depth
## 3 beta numeric L1 Regularization
## 4 lambda numeric Tree Depth Regularization
## 5 loss_type character Loss
##
## $grid
## function (x, y, len = NULL, search = "grid")
## {
##   if (search == "grid") {
##     out <- expand.grid(tree_depth = seq(1, len), num_iter = floor((1:len) *
##       50), beta = 2^seq(-8, -4, length = len), lambda = 2^seq(-6,
##       -2, length = len), loss_type = "l")
##   }
##   else {
##     out <- data.frame(num_iter = floor(runif(len, min = 1,
##       max = 500)), tree_depth = sample(1:20, replace = TRUE,
##       size = len), beta = runif(len, max = 0.25), lambda = runif(len,
##       max = 0.25), loss_type = sample(c("l"), replace = TRUE,
##       size = len))
##   }
##   out
## }

```

```
getModelInfo("ORFpls")$ORFpls[get]
```

```

## $parameters
## parameter class label
## 1 mtry numeric #Randomly Selected Predictors
##
## $grid
## function (x, y, len = NULL, search = "grid")
## {
##   if (search == "grid") {
##     out <- data.frame(mtry = caret::var_seq(p = ncol(x),
##       classification = is.factor(y), len = len))
##   }
##   else {
##     out <- data.frame(mtry = unique(sample(1:ncol(x), size = len,
##       replace = TRUE)))
##   }
##   out
## }

```
